# Supplementary material
Source: PubMed Central journal article supplement (PMC4917059)
Supplement: supp_gzw023_gzw023supp.pdf [file supp_gzw023_gzw023supp.pdf]

## Supporting Material

### The effect of chirality and steric hindrance on intrinsic backbone conformational propensities: Tools for protein design

Matthew Carter Childers, Clare-Louise Towse and Valerie Daggett\*

#### Supporting Material Figure Legends

**Figure S1.** Convergence of guest residue sampling across different portions of the trajectories and in replicate simulations under native conditions. Comparison of fraction of time spent in each of the 64 possible conformational states over different portions of the trajectory (above) and across replicate simulations (below) for GGAGG (a), GGGGG (b), and GGWGG (c) in water at 298 K.

**Figure S2.** Convergence of guest residue sampling across different portions of the trajectories and in replicate simulations under chemically denaturing conditions. Comparison of fraction of time spent in each of the 64 possible conformational states over different portions of the trajectory (above) and across replicate simulations (below) for GGAGG (a), GGGGG (b), and GGWGG (c) in 8M urea at 298 K.

**Figure S3. Intramolecular interactions do not change in response to host peptide sequence or environment.** (A) Hydrogen bond formation in GGAGG, water 298 (left) and in AAAAA, water 298 (right). (B) Hydrophobic interactions in AAAAA, water 298 (left) and in water 498 (right).

**A) GGAGG**  
 $H_2O$ , 298 K

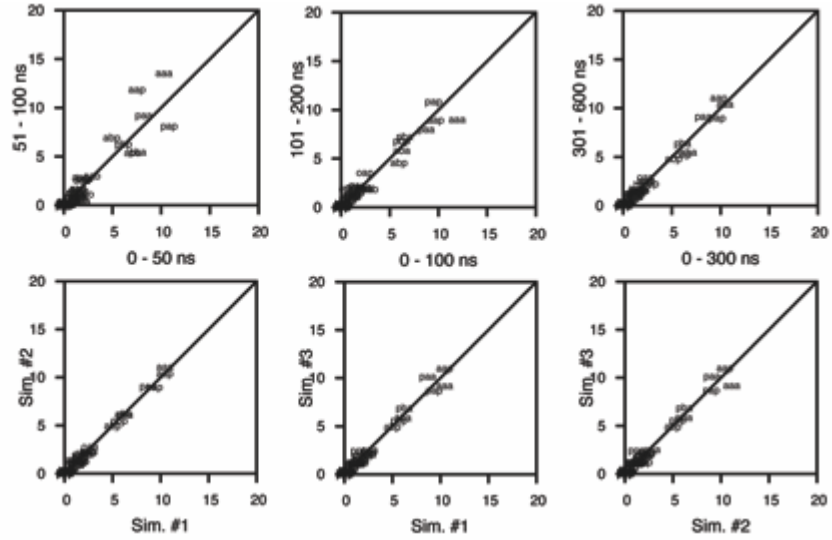

**B) GGGGG**  
 $H_2O$ , 298 K

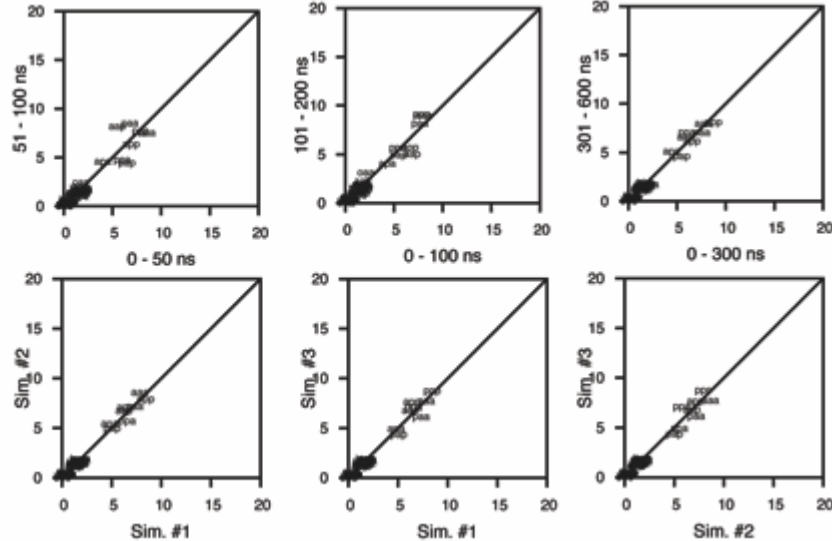

**C) GGWGG**  
 $H_2O$ , 298 K

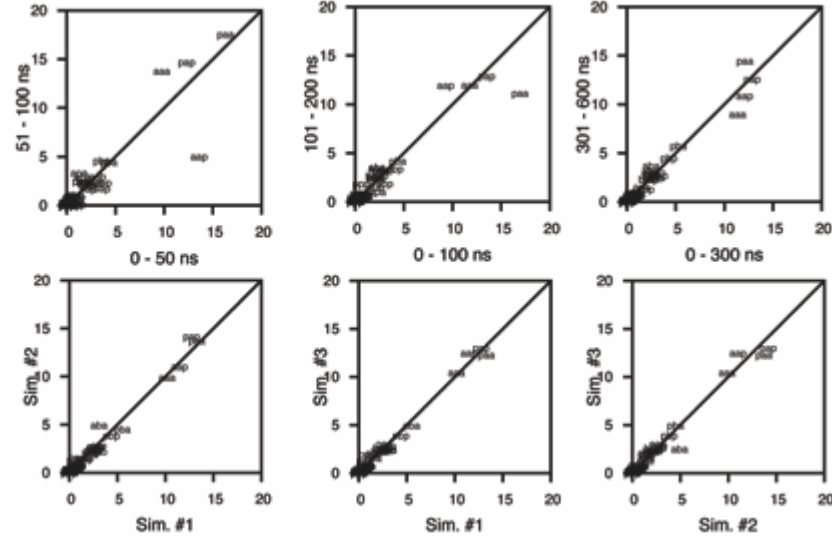

Figure S1

**A) GGAGG**  
8M Urea, 298 K

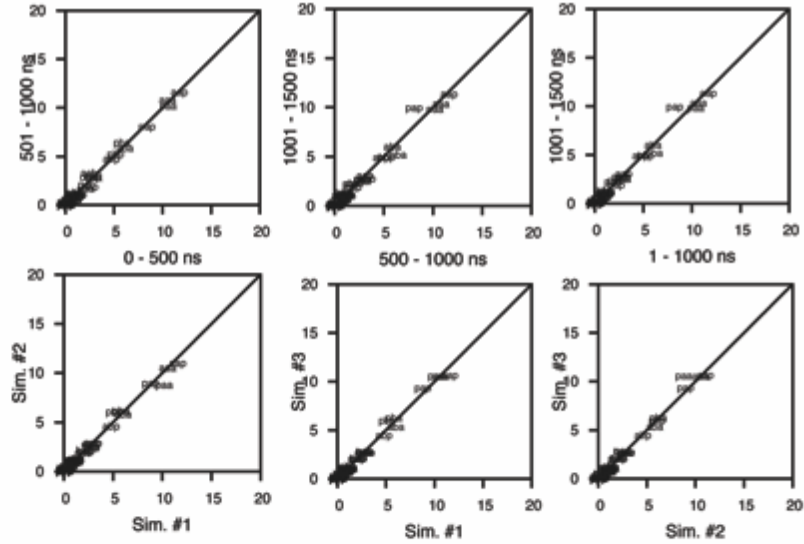

**B) GGGGG**  
8M Urea, 298 K

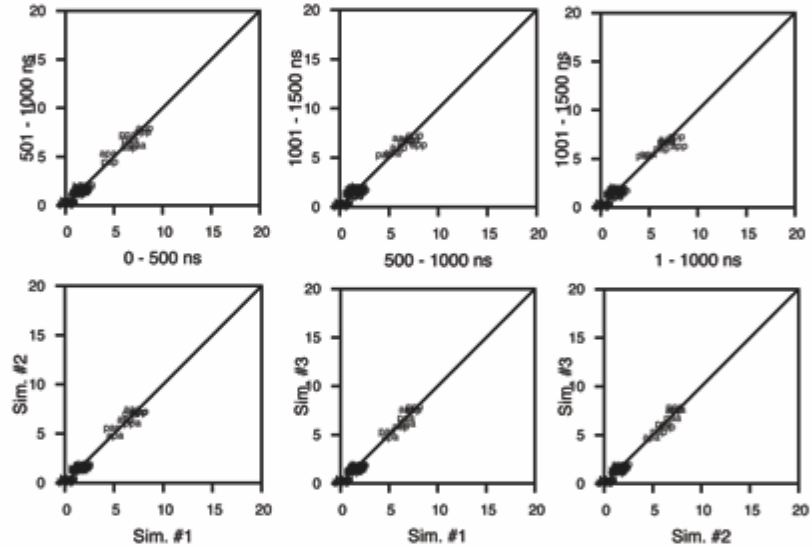

**C) GGWGG**  
8M Urea, 298 K

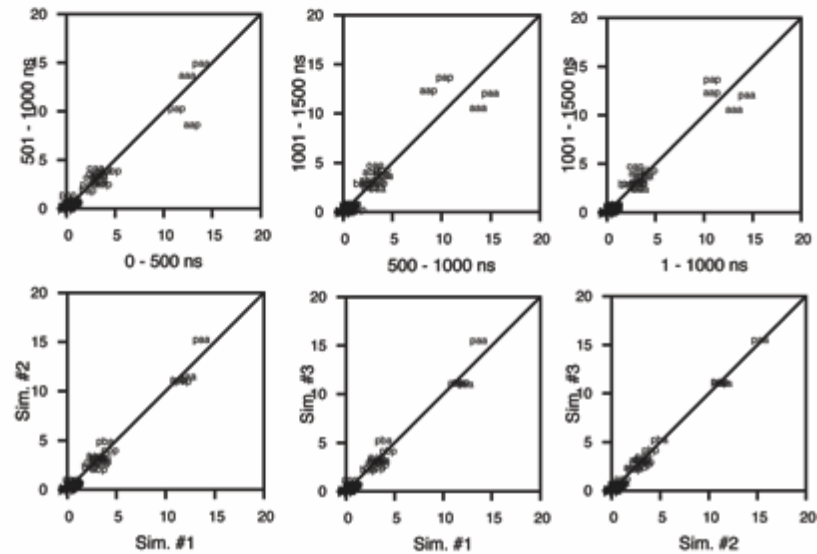

Figure S2

A)

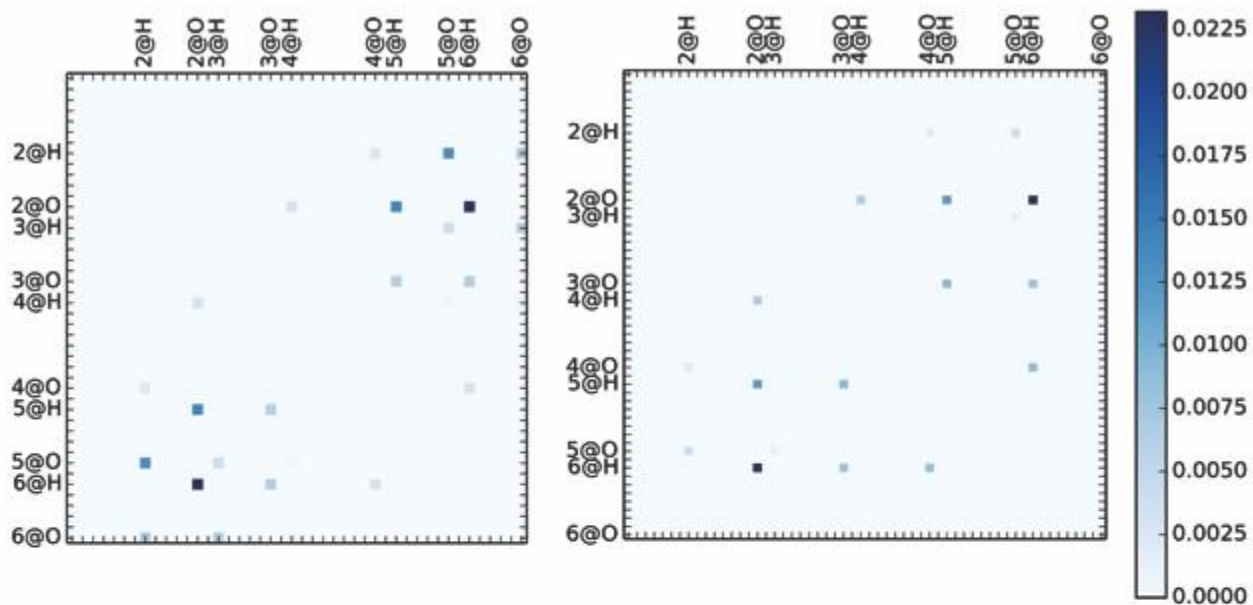

B)

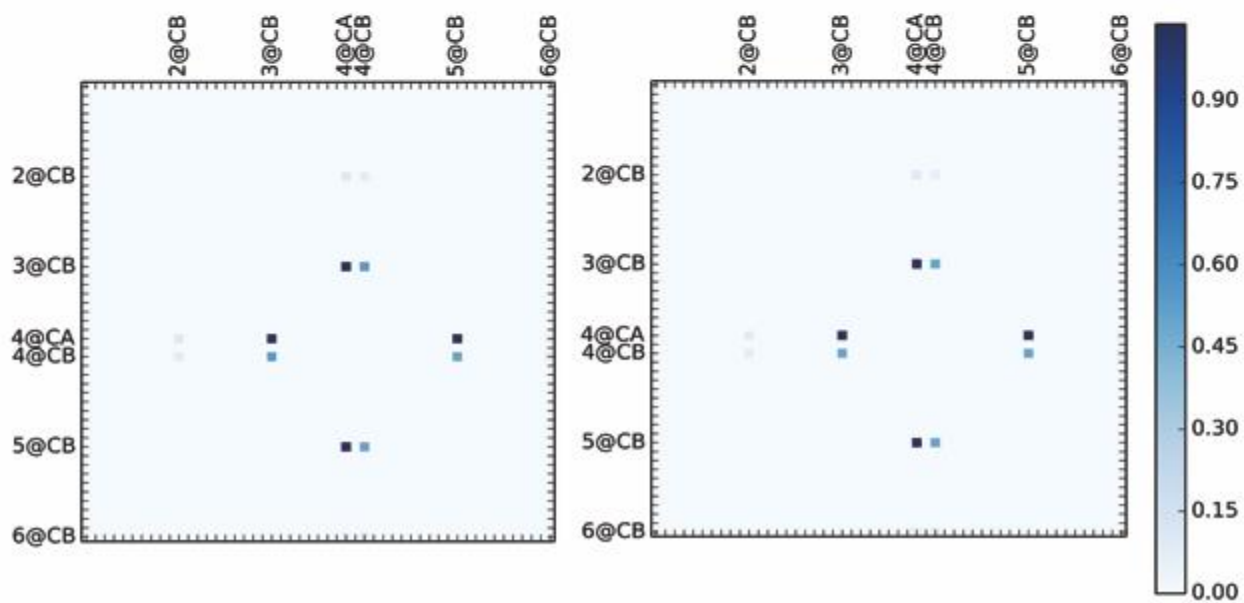

Figure S3

**Table S1. Correlation coefficients (R) between initial and latter portions of the GGXGG trajectories for the 64 conformational states populated by the three central residues.**

| <b>Guest X Residue</b> | <b>Water 298 K*</b> | <b>8M Urea 298 K†</b> | <b>Water 498 K§</b> |
|------------------------|---------------------|-----------------------|---------------------|
| <b>Ala-1</b>           | 0.99                | 1.00                  | 0.99                |
| <b>Ala-2</b>           | 0.99                | 0.98                  | 1.00                |
| <b>Ala-3</b>           | 0.97                | 0.99                  | 0.99                |
| <b>Arg</b>             | 0.99                | 0.99                  | 0.99                |
| <b>Asn</b>             | 0.99                | 0.99                  | 1.00                |
| <b>Asp</b>             | 0.99                | 0.99                  | 0.99                |
| <b>Ash</b>             | 0.98                | 0.99                  | 0.99                |
| <b>Cyh</b>             | 0.98                | 0.98                  | 0.99                |
| <b>Gln</b>             | 0.97                | 0.97                  | 0.99                |
| <b>Glu</b>             | 0.99                | 0.98                  | 1.00                |
| <b>Glh</b>             | 0.95                | 0.99                  | 1.00                |
| <b>Gly-1</b>           | 0.99                | 0.99                  | 0.99                |
| <b>Gly-2</b>           | 0.99                | 0.98                  | 0.95                |
| <b>Gly-3</b>           | 0.99                | 0.99                  | 0.98                |
| <b>Hid</b>             | 0.97                | 0.99                  | 0.98                |
| <b>Hie</b>             | 0.99                | 0.98                  | 0.99                |
| <b>Hip</b>             | 0.97                | 0.98                  | 0.99                |
| <b>Ile</b>             | 0.99                | 0.98                  | 0.99                |
| <b>Leu</b>             | 0.99                | 0.96                  | 0.99                |
| <b>Lys</b>             | 0.99                | 0.99                  | 0.99                |
| <b>Met</b>             | 0.98                | 0.98                  | 0.99                |
| <b>Phe</b>             | 1.00                | 0.99                  | 0.99                |
| <b>Pro</b>             | 0.98                | 0.99                  | 0.99                |
| <b>Ser</b>             | 1.00                | 0.99                  | 0.99                |
| <b>Thr</b>             | 0.99                | 0.97                  | 1.00                |
| <b>Trp-1</b>           | 0.98                | 0.98                  | 0.99                |
| <b>Trp-2</b>           | 0.99                | 0.96                  | -                   |
| <b>Trp-3</b>           | 0.99                | 0.97                  | -                   |
| <b>Tyr</b>             | 0.97                | 0.99                  | 0.99                |
| <b>Val</b>             | 0.99                | 0.98                  | 0.99                |
| <b>Average</b>         | <b>0.99</b>         | <b>0.98</b>           | <b>1.00</b>         |

The latter portions were that part of the trajectory (production dynamics) used for analysis. The start position and length of the production dynamics for each set of simulations was defined by the convergence behavior as exhibited in Figure X. \*last 300 ns, †last 500 ns, §last 50 ns.

**Table S2. Conformational propensities of the guest residues (X) in GGXGG in water at 298 K**

| Population Frequency (%) |              |             |                |              |                                   |                    |            |         |                   |           |          |       |
|--------------------------|--------------|-------------|----------------|--------------|-----------------------------------|--------------------|------------|---------|-------------------|-----------|----------|-------|
| X                        | By quadrant  |             |                |              | By specific conformational region |                    |            |         |                   |           |          |       |
|                          | $Q_{\alpha}$ | $Q_{\beta}$ | $Q_{\alpha L}$ | $Q_{\alpha}$ | $\alpha_R$                        | Near<br>$\alpha_R$ | $\alpha_L$ | $\beta$ | Non-<br>P $\beta$ | $P_{III}$ | $P_{IR}$ | Other |
| <b>Ala</b>               | 58.5         | 32.8        | 8.2            | 0.4          | 23.2                              | 26.8               | 6.7        | 19.3    | 9.3               | 8.0       | 6.2      | 19.6  |
| <b>Ala</b>               | 56.3         | 34.6        | 8.7            | 0.4          | 23.3                              | 25.2               | 7.2        | 20.9    | 10.0              | 8.9       | 6.6      | 18.9  |
| <b>Ala</b>               | 54.9         | 33.0        | 11.7           | 0.4          | 21.8                              | 25.5               | 10.0       | 19.9    | 9.6               | 8.4       | 6.3      | 18.4  |
| <b>Arg</b>               | 70.0         | 24.5        | 5.4            | 0.1          | 30.2                              | 31.7               | 4.7        | 17.1    | 7.9               | 8.3       | 2.7      | 14.6  |
| <b>Asn</b>               | 77.0         | 17.9        | 5.0            | 0.1          | 39.6                              | 32.8               | 4.4        | 13.6    | 8.1               | 4.2       | 2.7      | 8.3   |
| <b>Asp</b>               | 70.7         | 19.5        | 9.6            | 0.1          | 28.8                              | 38.9               | 9.1        | 5.3     | 3.4               | 0.4       | 5.2      | 14.3  |
| <b>Ash</b>               | 73.1         | 19.8        | 6.9            | 0.2          | 35.6                              | 33.6               | 6.1        | 15.1    | 9.6               | 3.6       | 3.6      | 7.9   |
| <b>Cyh</b>               | 59.2         | 34.0        | 6.7            | 0.1          | 24.3                              | 27.8               | 5.8        | 23.3    | 10.7              | 11.1      | 4.1      | 16.2  |
| <b>Gln</b>               | 68.8         | 28.2        | 2.9            | 0.1          | 30.6                              | 30.3               | 2.5        | 20.2    | 9.2               | 9.8       | 3.1      | 14.5  |
| <b>Glu</b>               | 60.9         | 32.8        | 6.2            | 0.1          | 31.0                              | 22.9               | 5.7        | 24.5    | 10.8              | 12.5      | 3.0      | 14.2  |
| <b>Glh</b>               | 54.4         | 23.5        | 21.9           | 0.2          | 25.8                              | 22.6               | 20.0       | 16.9    | 7.9               | 8.0       | 2.9      | 12.8  |
| <b>Gly</b>               | 40.3         | 9.6         | 40.4           | 9.7          | 15.2                              | 5.6                | 11.1       | 6.9     | 3.3               | 3.1       | 1.6      | 60.0  |
| <b>Gly</b>               | 41.1         | 9.1         | 41.1           | 8.7          | 16.1                              | 5.4                | 11.6       | 6.6     | 3.1               | 3.1       | 1.4      | 59.3  |
| <b>Gly</b>               | 39.2         | 9.4         | 42.3           | 9.1          | 15.5                              | 5.3                | 11.8       | 6.9     | 3.2               | 3.2       | 1.5      | 59.6  |
| <b>Hid</b>               | 67.0         | 25.9        | 7.0            | 0.1          | 26.5                              | 33.4               | 6.2        | 19.3    | 9.4               | 7.8       | 3.3      | 13.4  |
| <b>Hie</b>               | 70.3         | 25.9        | 3.7            | 0.1          | 33.2                              | 30.0               | 3.0        | 18.6    | 8.3               | 10.1      | 2.1      | 13.3  |
| <b>Hip</b>               | 70.1         | 29.5        | 0.4            | < 0.1        | 16.9                              | 45.0               | 0.2        | 12.8    | 7.8               | 2.0       | 8.9      | 19.1  |
| <b>Ile</b>               | 50.8         | 49.1        | 0.1            | << 0.1       | 17.5                              | 24.3               | 0.1        | 38.2    | 13.0              | 24.8      | 1.6      | 18.7  |
| <b>Leu</b>               | 70.3         | 23.7        | 5.9            | 0.1          | 35.2                              | 27.7               | 5.2        | 20.1    | 8.2               | 11.2      | 1.6      | 11.0  |
| <b>Lys</b>               | 71.6         | 24.3        | 4.1            | < 0.1        | 31.7                              | 31.3               | 3.7        | 17.7    | 8.3               | 8.3       | 2.8      | 13.8  |
| <b>Met</b>               | 68.0         | 26.0        | 5.9            | 0.2          | 31.3                              | 28.7               | 5.3        | 19.5    | 8.6               | 9.9       | 2.5      | 13.7  |
| <b>Phe</b>               | 68.2         | 24.5        | 7.2            | 0.1          | 28.4                              | 33.5               | 6.4        | 19      | 9.5               | 8.3       | 2.6      | 11.3  |
| <b>Pro</b>               | 21.0         | 79.0        | -              | -            | 19.2                              | << 0.1             | -          | 73.3    | 14.4              | 58.9      | -        | 7.5   |
| <b>Ser</b>               | 54.9         | 39.3        | 5.6            | 0.2          | 29.0                              | 17.0               | 5.0        | 31.5    | 11.0              | 19.7      | 2.1      | 16.1  |
| <b>Thr</b>               | 69.4         | 29.9        | 0.7            | 0.0          | 41.8                              | 22.7               | 0.6        | 22.8    | 8.7               | 13.7      | 0.9      | 11.5  |
| <b>Trp</b>               | 70.1         | 24.1        | 5.6            | 0.2          | 28.7                              | 34.6               | 5.0        | 18.2    | 8.7               | 8.5       | 2.5      | 12.0  |
| <b>Trp</b>               | 67.2         | 21.8        | 10.9           | 0.1          | 27.1                              | 34.2               | 9.8        | 16.3    | 7.9               | 7.4       | 2.2      | 11.4  |
| <b>Trp</b>               | 72.4         | 19.9        | 7.4            | 0.2          | 30.4                              | 36.1               | 6.7        | 12.5    | 6.9               | 6.4       | 2.3      | 11.2  |
| <b>Tyr</b>               | 71.4         | 24.4        | 4.1            | 0.1          | 29.8                              | 35.2               | 3.6        | 18.2    | 9.0               | 7.9       | 2.9      | 11.6  |
| <b>Val</b>               | 57.5         | 40.7        | 1.7            | -            | 21.0                              | 29.9               | 1.6        | 29.8    | 11.0              | 18.1      | 1.8      | 16.5  |

**Table S3. Conformational propensities of the guest residues (X) in AAXAA in water at 298 K**

| Population Frequency (%) |              |             |                |             |                                   |                    |            |         |                   |           |           |       |
|--------------------------|--------------|-------------|----------------|-------------|-----------------------------------|--------------------|------------|---------|-------------------|-----------|-----------|-------|
| X                        | By quadrant  |             |                |             | By specific conformational region |                    |            |         |                   |           |           |       |
|                          | $Q_{\alpha}$ | $Q_{\beta}$ | $Q_{\alpha L}$ | $Q_{\circ}$ | $\alpha_R$                        | Near<br>$\alpha_R$ | $\alpha_L$ | $\beta$ | Non-<br>P $\beta$ | $P_{III}$ | $P_{IIR}$ | Other |
| Ala                      | 46.2         | 39.8        | 13.6           | 0.4         | 20.3                              | 18.1               | 11.6       | 28.9    | 12.8              | 13.7      | 6.6       | 16.9  |
| Ala                      | 41.7         | 41.8        | 16.2           | 0.4         | 17.7                              | 16.1               | 14.0       | 32.2    | 14.4              | 15.4      | 6.1       | 16.2  |
| Ala                      | 45.6         | 41.7        | 12.4           | 0.3         | 20.3                              | 17.3               | 10.4       | 31.3    | 13.7              | 15.2      | 6.5       | 16.6  |
| Arg                      | 55.6         | 33.8        | 10.3           | 0.2         | 26.6                              | 21.7               | 9.2        | 28      | 12.0              | 14.5      | 3.4       | 12.6  |
| Asn                      | 59.2         | 33.4        | 7.3            | 0.1         | 34.0                              | 21.6               | 6.3        | 27.7    | 16.0              | 8.7       | 4.9       | 8.5   |
| Asp                      | 67.8         | 21.8        | 10.3           | 0.1         | 29.2                              | 36.2               | 9.7        | 6.9     | 4.6               | 0.4       | 6.5       | 13.5  |
| Ash                      | 65.4         | 24.5        | 10.0           | 0.1         | 36.5                              | 25.4               | 9.1        | 20      | 12.3              | 5.4       | 3.9       | 7.5   |
| Cyh                      | 48.2         | 41.4        | 10.0           | 0.4         | 20.8                              | 20.3               | 8.8        | 33.2    | 14.3              | 17.3      | 4.3       | 14.3  |
| Gln                      | 48.2         | 32.2        | 19.4           | 0.2         | 22.9                              | 18.8               | 17.7       | 26.4    | 11.0              | 14.1      | 3.2       | 12.2  |
| Glu                      | 50.6         | 36.8        | 12.4           | 0.2         | 25.9                              | 18.1               | 11.4       | 28.9    | 12.7              | 14.5      | 4.2       | 13.2  |
| Glh                      | 51.4         | 33.9        | 14.6           | 0.1         | 22.7                              | 22.2               | 13.3       | 26.4    | 11.7              | 13.0      | 4.2       | 12.9  |
| Gly                      | 41.2         | 9.2         | 39.4           | 10.2        | 14.2                              | 3.2                | 11.5       | 8       | 3.7               | 3.9       | 1.2       | 62.4  |
| Hid                      | 62.3         | 29.6        | 8.0            | 0.1         | 27.3                              | 28.3               | 7.2        | 23.1    | 11.8              | 9.5       | 4.0       | 11.9  |
| Hie                      | 54.6         | 35.1        | 10.2           | 0.1         | 27.9                              | 20.0               | 8.9        | 29.5    | 13.1              | 14.9      | 3.0       | 12.2  |
| Hip                      | 42.3         | 27.1        | 30.1           | 0.5         | 8.8                               | 28.2               | 24.7       | 16.6    | 10.3              | 3.2       | 8.2       | 16.6  |
| Ile                      | 39.6         | 55.7        | 4.7            | << 0.1      | 15.5                              | 17.0               | 4.4        | 46.1    | 14.2              | 31.4      | 1.8       | 15.7  |
| Leu                      | 61.1         | 21.0        | 17.6           | 0.3         | 33.7                              | 21.2               | 15.8       | 18      | 6.9               | 10.4      | 1.3       | 10.7  |
| Lys                      | 55.2         | 32.1        | 12.5           | 0.2         | 27.2                              | 21.1               | 11.3       | 26.3    | 10.9              | 14.0      | 3.3       | 12.2  |
| Met                      | 51.0         | 28.7        | 20.0           | 0.3         | 25.3                              | 19.7               | 18.0       | 23      | 10.0              | 11.7      | 2.8       | 12.4  |
| Phe                      | 56.8         | 25.8        | 17.2           | 0.2         | 26.4                              | 25.1               | 15.5       | 20.4    | 10.5              | 8.3       | 3.2       | 10.9  |
| Pro                      | 5.1          | 94.9        | -              | -           | 3.1                               | -                  | -          | 89.4    | 11.2              | 78.2      | -         | 7.6   |
| Ser                      | 45.0         | 49.9        | 5.0            | 0.1         | 24.0                              | 10.2               | 4.5        | 44.6    | 12.7              | 31.3      | 1.7       | 15.5  |
| Thr                      | 55.0         | 44.3        | 0.7            | < 0.1       | 35.77                             | 14.2               | 0.7        | 38.1    | 12.3              | 25.5      | 1.2       | 10.6  |
| Trp                      | 62.3         | 26.0        | 11.6           | 0.2         | 28.6                              | 28.0               | 10.5       | 20.5    | 10.8              | 8.1       | 3.2       | 10.8  |
| Tyr                      | 54.0         | 25.7        | 20.0           | 0.3         | 24.0                              | 24.4               | 18.0       | 20.1    | 10.9              | 7.5       | 3.7       | 11.6  |
| Val                      | 42.3         | 56.5        | 1.2            | << 0.1      | 16.8                              | 19.0               | 1.1        | 49.4    | 17.0              | 31.4      | 2.3       | 12.3  |

**Table S4. Difference in the sampling of conformational regions (%) of GGXGG relative to AAXAA in water at 298 K**

**Population Frequency (%)**

| X   | By quadrant |           |                |         | By specific conformational region |                    |            |         |                   |           |          |       |
|-----|-------------|-----------|----------------|---------|-----------------------------------|--------------------|------------|---------|-------------------|-----------|----------|-------|
|     | $Q_\alpha$  | $Q_\beta$ | $Q_{\alpha L}$ | $Q_o$   | $\alpha_R$                        | Near<br>$\alpha_R$ | $\alpha_L$ | $\beta$ | Non-<br>P $\beta$ | $P_{III}$ | $P_{IR}$ | Other |
| Ala | 12.3        | -6.9      | -5.5           | 0.1     | 2.9                               | 8.7                | -4.9       | -9.6    | -3.5              | -5.6      | -0.3     | 2.7   |
| Arg | 14.3        | -9.3      | -4.9           | -0.1    | 3.6                               | 10.0               | -4.5       | -10.9   | -4.1              | -6.2      | -0.7     | 2.0   |
| Asn | 17.8        | -15.5     | -2.3           | < 0.1   | 5.6                               | 11.2               | -1.9       | -14.1   | -8.0              | -4.5      | -2.2     | -0.2  |
| Asp | 3.0         | -2.3      | -0.7           | < 0.1   | -0.5                              | 2.7                | -0.6       | -1.6    | -1.1              | << 0.1    | -1.3     | 0.8   |
| Ash | 7.7         | -4.7      | -3.1           | 0.1     | -0.9                              | 8.1                | -2.9       | -4.8    | -2.7              | -1.8      | -0.3     | 0.4   |
| Cyh | 11.0        | -7.4      | -3.4           | -0.2    | 3.5                               | 7.5                | -3.0       | -10.0   | -3.5              | -6.2      | -0.2     | 1.9   |
| Gln | 20.7        | -4.0      | -16.5          | -0.1    | 7.6                               | 11.4               | -15.2      | -6.2    | -1.7              | -4.3      | -0.2     | 2.3   |
| Glu | 10.3        | -4.0      | -6.2           | -0.1    | 5.1                               | 4.7                | -5.7       | -4.4    | -1.9              | -1.9      | -1.2     | 1.0   |
| Glh | 3.0         | -10.4     | 7.3            | 0.1     | 3.1                               | 0.4                | 6.7        | -9.5    | -3.8              | -5.0      | -1.3     | -0.1  |
| Gly | -0.8        | 0.4       | 1.0            | -0.5    | 1.1                               | 2.4                | -0.3       | -1.1    | -0.4              | -0.7      | 0.3      | -2.4  |
| Hid | 4.7         | -3.8      | -0.9           | < 0.1   | -0.8                              | 5.1                | -1.0       | -4.5    | -2.4              | -1.7      | -0.7     | 1.5   |
| Hie | 15.8        | -9.3      | -6.5           | < 0.1   | 5.3                               | 10.0               | -5.8       | -10.2   | -4.8              | -4.8      | -0.9     | 1.1   |
| Hip | 27.7        | 2.4       | -29.7          | -0.4    | 8.1                               | 16.9               | -24.5      | -3.8    | -2.5              | -1.2      | 0.7      | 2.5   |
| Ile | 11.1        | -6.6      | -4.6           | < -0.1  | 2.0                               | 7.3                | -4.3       | -7.9    | -1.2              | -6.6      | -0.2     | 3.0   |
| Leu | 9.2         | 2.8       | -11.8          | -0.1    | 1.6                               | 6.5                | -10.6      | 2.1     | 1.3               | 0.7       | 0.3      | 0.3   |
| Lys | 16.4        | -7.8      | -8.4           | -0.1    | 4.6                               | 10.3               | -7.6       | -8.7    | -2.6              | -5.8      | -0.5     | 1.6   |
| Met | 17.0        | -2.7      | -14.2          | -0.1    | 6.0                               | 9.0                | -12.8      | -3.6    | -1.4              | -1.9      | -0.3     | 1.3   |
| Phe | 11.4        | -1.3      | -10.0          | < -0.1  | 2.0                               | 8.5                | -9.2       | -1.4    | -1.0              | -0.1      | -0.6     | 0.4   |
| Pro | 16.0        | -16.0     | -              | -       | 16.1                              | << 0.1             | -          | -16.1   | 3.2               | -19.3     | -        | -0.1  |
| Ser | 9.9         | -10.6     | 0.6            | 0.1     | 5.0                               | 6.8                | 0.5        | -13.2   | -1.6              | -11.6     | 0.4      | 0.6   |
| Thr | 14.4        | -14.4     | 0.0            | 0.0     | 6.0                               | 8.5                | -0.1       | -15.3   | -3.4              | -11.8     | -0.3     | 1.0   |
| Trp | 7.8         | -1.9      | -5.9           | << 0.1  | 0.1                               | 6.6                | -5.5       | -2.2    | -2.1              | 0.4       | -0.7     | 1.2   |
| Tyr | 17.3        | -1.3      | -15.9          | -0.2    | 5.8                               | 10.8               | -14.4      | -2.0    | -1.8              | 0.4       | -0.8     | < 0.1 |
| Val | 15.3        | -15.8     | 0.5            | << -0.1 | 4.1                               | 10.8               | 0.5        | -19.7   | -6.0              | -13.3     | -0.5     | 4.3   |



**Table S5. Similarity correlation matrices for the  $\phi/\psi$  frequency distributions of the guest residues in the GGXGG and AAXAA peptides in water at 298 K.**

|                   |     | GGXGG water 298 K |             |             |             |              |             |             |             |             |             |             |             |              |             |             |             |             |             |             |             |             |             |             |             |     |  |
|-------------------|-----|-------------------|-------------|-------------|-------------|--------------|-------------|-------------|-------------|-------------|-------------|-------------|-------------|--------------|-------------|-------------|-------------|-------------|-------------|-------------|-------------|-------------|-------------|-------------|-------------|-----|--|
|                   |     | ALA               | ARG         | ASH         | ASN         | ASP          | CYS         | GLH         | GLN         | GLU         | GLY         | HID         | HIE         | HIP          | ILE         | LEU         | LYS         | MET         | PHE         | PRO         | SER         | THR         | TRP         | TYR         | VAL         |     |  |
| AAXAA water 298 K | ALA |                   | 0.94        | 0.93        | 0.92        | 0.87         | 0.96        | 0.90        | 0.95        | 0.94        | <b>0.43</b> | 0.95        | 0.95        | 0.85         | 0.69        | 0.92        | 0.94        | 0.94        | 0.95        | <b>0.21</b> | 0.87        | 0.87        | 0.95        | 0.95        | 0.83        | ALA |  |
|                   | ARG | 0.95              |             | 0.94        | 0.95        | 0.84         | 0.98        | 0.91        | 1.00        | 0.97        | <b>0.41</b> | 0.99        | 0.99        | 0.80         | 0.70        | 0.98        | 1.00        | 1.00        | 0.99        | <b>0.15</b> | 0.87        | 0.90        | 0.99        | 0.99        | 0.87        | ARG |  |
|                   | ASH | 0.87              | 0.91        |             | 0.99        | 0.82         | 0.91        | 0.87        | 0.94        | 0.93        | <b>0.40</b> | 0.95        | 0.96        | 0.78         | 0.54        | 0.94        | 0.94        | 0.94        | 0.96        | <b>0.15</b> | 0.84        | 0.90        | 0.95        | 0.96        | 0.73        | ASH |  |
|                   | ASN | 0.88              | 0.92        | 0.99        |             | 0.79         | 0.91        | 0.87        | 0.95        | 0.94        | <b>0.42</b> | 0.95        | 0.97        | 0.75         | 0.56        | 0.96        | 0.95        | 0.95        | 0.96        | <b>0.16</b> | 0.84        | 0.91        | 0.95        | 0.96        | 0.74        | ASN |  |
|                   | ASP | 0.80              | 0.83        | 0.78        | 0.76        |              | 0.89        | 0.80        | 0.83        | 0.81        | <b>0.27</b> | 0.86        | 0.85        | 0.78         | 0.65        | 0.78        | 0.82        | 0.82        | 0.85        | <b>0.03</b> | 0.77        | 0.82        | 0.87        | 0.86        | 0.79        | ASP |  |
|                   | CYS | 0.96              | 0.98        | 0.85        | 0.87        | 0.83         |             | 0.91        | 0.98        | 0.97        | <b>0.37</b> | 0.98        | 0.97        | 0.82         | 0.78        | 0.95        | 0.97        | 0.97        | 0.97        | <b>0.21</b> | 0.91        | 0.91        | 0.98        | 0.97        | 0.91        | CYS |  |
|                   | GLH | 0.96              | 0.98        | 0.89        | 0.89        | 0.83         | 0.97        |             | 0.89        | 0.92        | <b>0.49</b> | 0.91        | 0.89        | 0.68         | 0.61        | 0.91        | 0.90        | 0.92        | 0.91        | <b>0.16</b> | 0.84        | 0.83        | 0.90        | 0.89        | 0.77        | GLH |  |
|                   | GLN | 0.96              | 0.96        | 0.86        | 0.87        | 0.79         | 0.95        | 0.99        |             | 0.98        | <b>0.41</b> | 0.99        | 0.99        | 0.80         | 0.72        | 0.98        | 1.00        | 0.99        | 0.99        | <b>0.18</b> | 0.89        | 0.92        | 0.99        | 0.99        | 0.87        | GLN |  |
|                   | GLU | 0.96              | 0.98        | 0.91        | 0.93        | 0.78         | 0.96        | 0.98        | 0.97        |             | <b>0.46</b> | 0.95        | 0.98        | 0.72         | 0.72        | 0.98        | 0.97        | 0.98        | 0.96        | <b>0.27</b> | 0.94        | 0.95        | 0.96        | 0.95        | 0.86        | GLU |  |
|                   | GLY | <b>0.38</b>       | <b>0.35</b> | <b>0.33</b> | <b>0.33</b> | <b>0.20</b>  | <b>0.31</b> | <b>0.37</b> | <b>0.40</b> | <b>0.40</b> |             | <b>0.39</b> | <b>0.42</b> | <b>0.22</b>  | <b>0.19</b> | <b>0.44</b> | <b>0.42</b> | <b>0.43</b> | <b>0.39</b> | <b>0.11</b> | <b>0.40</b> | <b>0.39</b> | <b>0.38</b> | <b>0.37</b> | <b>0.26</b> | GLY |  |
|                   | HID | 0.92              | 0.98        | 0.93        | 0.94        | 0.86         | 0.94        | 0.96        | 0.92        | 0.95        | <b>0.31</b> |             | 0.98        | 0.84         | 0.68        | 0.97        | 0.99        | 0.98        | 1.00        | <b>0.14</b> | 0.85        | 0.88        | 1.00        | 0.99        | 0.86        | HID |  |
|                   | HIE | 0.96              | 0.99        | 0.93        | 0.95        | 0.81         | 0.97        | 0.97        | 0.95        | 0.98        | <b>0.37</b> | 0.96        |             | 0.78         | 0.71        | 0.98        | 0.98        | 0.99        | 0.98        | <b>0.21</b> | 0.91        | 0.95        | 0.98        | 0.98        | 0.87        | HIE |  |
|                   | HIP | 0.73              | 0.67        | 0.59        | 0.57        | 0.68         | 0.68        | 0.77        | 0.75        | 0.67        | <b>0.38</b> | 0.69        | 0.64        |              | 0.56        | 0.70        | 0.79        | 0.76        | 0.82        | <b>0.02</b> | 0.60        | 0.63        | 0.82        | 0.82        | 0.72        | HIP |  |
|                   | ILE | 0.73              | 0.73        | <b>0.48</b> | 0.52        | 0.52         | 0.80        | 0.70        | 0.69        | 0.69        | <b>0.18</b> | 0.64        | 0.72        | <b>0.40</b>  |             | 0.67        | 0.69        | 0.70        | 0.67        | <b>0.30</b> | 0.78        | 0.72        | 0.69        | 0.68        | 0.95        | ILE |  |
|                   | LEU | 0.92              | 0.97        | 0.94        | 0.93        | 0.80         | 0.92        | 0.96        | 0.96        | 0.96        | <b>0.41</b> | 0.95        | 0.97        | 0.65         | 0.61        |             | 0.99        | 0.99        | 0.98        | <b>0.21</b> | 0.90        | 0.93        | 0.97        | 0.97        | 0.83        | LEU |  |
|                   | LYS | 0.95              | 0.99        | 0.92        | 0.93        | 0.81         | 0.97        | 0.99        | 0.97        | 0.99        | <b>0.37</b> | 0.97        | 0.99        | 0.67         | 0.70        | 0.98        |             | 1.00        | 0.99        | <b>0.15</b> | 0.87        | 0.90        | 0.99        | 0.99        | 0.85        | LYS |  |
|                   | MET | 0.95              | 0.97        | 0.89        | 0.89        | 0.80         | 0.94        | 0.98        | 0.99        | 0.97        | <b>0.40</b> | 0.94        | 0.96        | 0.74         | 0.64        | 0.98        | 0.98        |             | 0.99        | <b>0.18</b> | 0.89        | 0.92        | 0.99        | 0.99        | 0.86        | MET |  |
|                   | PHE | 0.93              | 0.97        | 0.94        | 0.93        | 0.84         | 0.93        | 0.98        | 0.97        | 0.96        | <b>0.36</b> | 0.97        | 0.96        | 0.75         | 0.60        | 0.98        | 0.98        | 0.98        |             | <b>0.15</b> | 0.86        | 0.89        | 1.00        | 1.00        | 0.84        | PHE |  |
|                   | PRO | <b>0.30</b>       | <b>0.19</b> | <b>0.08</b> | <b>0.13</b> | <b>-0.02</b> | <b>0.29</b> | <b>0.18</b> | <b>0.20</b> | <b>0.22</b> | <b>0.06</b> | <b>0.10</b> | <b>0.25</b> | <b>-0.01</b> | <b>0.49</b> | <b>0.12</b> | <b>0.19</b> | <b>0.15</b> | <b>0.09</b> |             | <b>0.45</b> | <b>0.30</b> | <b>0.14</b> | <b>0.14</b> | <b>0.25</b> | PRO |  |
|                   | SER | 0.81              | 0.78        | 0.63        | 0.67        | 0.54         | 0.84        | 0.74        | 0.75        | 0.77        | <b>0.30</b> | 0.68        | 0.81        | <b>0.34</b>  | 0.86        | 0.71        | 0.77        | 0.71        | 0.66        | 0.61        |             | 0.95        | 0.86        | 0.86        | 0.85        | SER |  |
|                   | THR | 0.84              | 0.87        | 0.82        | 0.85        | 0.69         | 0.88        | 0.81        | 0.80        | 0.87        | <b>0.30</b> | 0.81        | 0.91        | <b>0.36</b>  | 0.75        | 0.83        | 0.86        | 0.79        | 0.78        | <b>0.42</b> | 0.90        |             | 0.89        | 0.90        | 0.84        | THR |  |
|                   | TRP | 0.93              | 0.98        | 0.94        | 0.94        | 0.88         | 0.94        | 0.97        | 0.94        | 0.95        | <b>0.33</b> | 0.99        | 0.97        | 0.71         | 0.62        | 0.97        | 0.98        | 0.96        | 0.99        | <b>0.09</b> | 0.67        | 0.80        |             | 1.00        | 0.86        | TRP |  |
|                   | TYR | 0.93              | 0.96        | 0.91        | 0.90        | 0.84         | 0.93        | 0.98        | 0.97        | 0.95        | <b>0.37</b> | 0.96        | 0.94        | 0.79         | 0.59        | 0.97        | 0.96        | 0.98        | 0.99        | <b>0.07</b> | 0.63        | 0.74        | 0.98        |             | 0.85        | TYR |  |
|                   | VAL | 0.79              | 0.81        | 0.58        | 0.63        | 0.59         | 0.86        | 0.77        | 0.75        | 0.76        | <b>0.18</b> | 0.73        | 0.80        | <b>0.43</b>  | 0.98        | 0.68        | 0.78        | 0.70        | 0.67        | <b>0.48</b> | 0.88        | 0.82        | 0.71        | 0.66        |             | VAL |  |
|                   |     | ALA               | ARG         | ASH         | ASN         | ASP          | CYS         | GLH         | GLN         | GLU         | GLY         | HID         | HIE         | HIP          | ILE         | LEU         | LYS         | MET         | PHE         | PRO         | SER         | THR         | TRP         | TYR         | VAL         |     |  |

**Table S6. Conformational propensities of the guest residues (X) in GGXGG in urea at 298 K.**

**Population Frequency (%)**

| X   | By quadrant    |                |                 |                | By specific conformational region |                     |                |      |         |                  |                 |       |
|-----|----------------|----------------|-----------------|----------------|-----------------------------------|---------------------|----------------|------|---------|------------------|-----------------|-------|
|     | Q <sub>α</sub> | Q <sub>β</sub> | Q <sub>αL</sub> | Q <sub>o</sub> | α <sub>R</sub>                    | Near α <sub>R</sub> | α <sub>L</sub> | β    | Non-P β | P <sub>III</sub> | P <sub>IR</sub> | Other |
| Ala | 63.8           | 30.7           | 5.1             | 0.4            | 20.3                              | 34.7                | 3.9            | 19.4 | 9.1     | 8.5              | 5.5             | 18.2  |
| Ala | 64.8           | 31.5           | 3.4             | 0.3            | 20.3                              | 35.9                | 2.5            | 19.6 | 9.1     | 8.7              | 5.5             | 18.1  |
| Ala | 61.7           | 31.4           | 6.6             | 0.3            | 19.4                              | 33.9                | 5.2            | 20.2 | 9.3     | 9.0              | 5.6             | 17.6  |
| Arg | 67.6           | 27.9           | 4.4             | 0.1            | 23.6                              | 36.3                | 3.8            | 22.0 | 10.0    | 11.0             | 2.6             | 12.6  |
| Asn | 78.9           | 19.2           | 1.8             | 0.1            | 33.4                              | 40.7                | 1.5            | 15.5 | 8.7     | 5.5              | 2.5             | 7.6   |
| Asp | 81.5           | 16.5           | 1.9             | 0.1            | 24.8                              | 53.4                | 1.6            | 5.2  | 3.4     | 0.4              | 4.3             | 12.1  |
| Ash | 73.6           | 18.3           | 8.0             | 0.1            | 28.8                              | 41.0                | 7.1            | 14.3 | 8.8     | 3.9              | 3.0             | 7.5   |
| Cyh | 66.1           | 29.4           | 4.3             | 0.2            | 20.9                              | 38.1                | 3.7            | 21.7 | 9.6     | 11.2             | 2.6             | 14.0  |
| Gln | 74.6           | 22.8           | 2.6             | < 0.1          | 27.8                              | 38.9                | 2.2            | 17.1 | 7.9     | 8.3              | 2.2             | 12.8  |
| Glu | 64.3           | 31.0           | 4.6             | 0.1            | 27.9                              | 28.9                | 4.1            | 25.3 | 10.4    | 14.1             | 2.1             | 12.7  |
| Glh | 73.0           | 24.3           | 2.7             | < 0.1          | 23.8                              | 41.4                | 2.3            | 16.5 | 8.0     | 7.3              | 3.2             | 14.0  |
| Gly | 39.9           | 10.4           | 39.9            | 9.8            | 12.6                              | 8.0                 | 8.4            | 7.6  | 3.7     | 3.4              | 1.6             | 62.2  |
| Gly | 41.3           | 9.3            | 39.7            | 9.7            | 13.0                              | 8.4                 | 7.8            | 6.7  | 3.2     | 3.0              | 1.6             | 63.1  |
| Gly | 39.9           | 10.0           | 40.8            | 9.4            | 12.0                              | 8.2                 | 8.3            | 7.3  | 3.5     | 3.3              | 1.6             | 63.1  |
| Hid | 73.8           | 21.7           | 4.3             | 0.1            | 24.4                              | 42.3                | 3.8            | 15.6 | 7.6     | 7.0              | 2.4             | 12.5  |
| Hie | 70.1           | 23.5           | 6.1             | 0.2            | 25.1                              | 38.0                | 5.2            | 18.2 | 7.2     | 10.3             | 1.7             | 12.6  |
| Hip | 75.1           | 23.1           | 1.8             | 0.1            | 13.0                              | 54.7                | 1.5            | 9.4  | 5.8     | 1.5              | 6.6             | 16.9  |
| Ile | 58.3           | 41.6           | 0.2             | << 0.1         | 13.3                              | 36.3                | 0.2            | 29.9 | 10.6    | 18.8             | 1.3             | 19.5  |
| Leu | 77.2           | 19.0           | 3.7             | 0.1            | 32.0                              | 37.4                | 3.3            | 16.4 | 6.5     | 9.4              | 1.1             | 10.2  |
| Lys | 73.3           | 23.2           | 3.5             | 0.1            | 27.1                              | 38.5                | 3.1            | 17.7 | 8.2     | 8.5              | 2.4             | 12.2  |
| Met | 67.4           | 22.3           | 10.1            | 0.2            | 24.1                              | 36.3                | 9.2            | 17.1 | 7.3     | 8.9              | 2.1             | 12.2  |
| Phe | 76.3           | 21.4           | 2.2             | 0.1            | 27.2                              | 42.9                | 2.0            | 16.8 | 8.5     | 7.3              | 2.2             | 10.0  |
| Pro | 7.2            | 92.8           | -               | -              | 5.2                               | << 0.1              | -              | 86.1 | 16.1    | 70.0             | -               | 8.7   |
| Ser | 55.5           | 41.7           | 2.7             | 0.1            | 26.2                              | 20.2                | 2.4            | 35.7 | 11.1    | 24.1             | 1.5             | 14.5  |
| Thr | 62.0           | 38.0           | < 0.1           | << 0.1         | 33.8                              | 23.4                | < 0.1          | 31.3 | 10.8    | 20.3             | 0.6             | 11.1  |
| Trp | 76.6           | 21.4           | 1.9             | 0.1            | 27.6                              | 42.4                | 1.6            | 16.4 | 8.4     | 7.0              | 2.1             | 10.8  |
| Trp | 75.5           | 19.1           | 5.4             | 0.1            | 26.7                              | 42.5                | 4.7            | 14.4 | 6.9     | 6.6              | 1.9             | 10.7  |
| Trp | 73.7           | 20.3           | 5.8             | 0.2            | 25.5                              | 41.9                | 5.2            | 15.7 | 7.6     | 7.1              | 2.2             | 10.6  |
| Tyr | 77.0           | 18.2           | 4.7             | 0.1            | 28.4                              | 42.7                | 3.9            | 13.8 | 6.9     | 6.0              | 1.9             | 10.2  |
| Val | 65.2           | 34.7           | < 0.1           | << 0.1         | 20.5                              | 38.0                | < 0.1          | 25.4 | 9.6     | 15.3             | 1.7             | 14.9  |

**Table S7. Conformational propensities of the guest residues (X) in AAXAA in urea at 298 K**

**Population Frequency (%)**

| X   | By quadrant    |                |                 |                | By specific conformational region |                     |                |      |         |      |     |       |
|-----|----------------|----------------|-----------------|----------------|-----------------------------------|---------------------|----------------|------|---------|------|-----|-------|
|     | Q <sub>α</sub> | Q <sub>β</sub> | Q <sub>αL</sub> | Q <sub>o</sub> | α <sub>R</sub>                    | Near α <sub>R</sub> | α <sub>L</sub> | β    | Non-P β | PIIL | PIR | Other |
| Ala | 45.1           | 48.1           | 6.7             | 0.2            | 13.1                              | 23.6                | 5.3            | 39.7 | 18.2    | 17.6 | 8.1 | 14.0  |
| Ala | 50.4           | 40.4           | 8.8             | 0.3            | 16.2                              | 26.3                | 7.0            | 32.7 | 13.8    | 16.3 | 5.9 | 14.6  |
| Ala | 40.6           | 48.5           | 10.6            | 0.3            | 13.6                              | 19.3                | 8.9            | 39   | 16.5    | 19.0 | 8.3 | 14.4  |
| Arg | 55.8           | 37.9           | 6.2             | 0.1            | 19.2                              | 29.7                | 5.7            | 33.2 | 14.6    | 16.8 | 3.6 | 10.4  |
| Asn | 50.9           | 44.7           | 4.3             | < 0.1          | 20.1                              | 27.2                | 3.7            | 37.8 | 20.9    | 12.5 | 7.2 | 8.3   |
| Asp | 81.7           | 15.8           | 2.4             | < 0.1          | 23.7                              | 55.5                | 2.2            | 5.4  | 3.4     | 0.3  | 4.7 | 10.3  |
| Ash | 57.9           | 34.5           | 7.6             | 0.1            | 25.0                              | 29.7                | 6.8            | 28   | 16.5    | 5.8  | 8.9 | 7.2   |
| Cyh | 44.0           | 50.9           | 5.0             | 0.1            | 13.0                              | 22.7                | 4.2            | 44.4 | 19.7    | 21.9 | 6.1 | 12.4  |
| Gln | 58.8           | 32.8           | 8.3             | 0.1            | 21.9                              | 29.5                | 7.5            | 28.8 | 12.2    | 15.0 | 3.3 | 10.7  |
| Glu | 53.6           | 42.9           | 3.4             | 0.1            | 22.0                              | 23.7                | 3.0            | 38.6 | 15.6    | 21.3 | 3.4 | 11.1  |
| Glh | 48.3           | 36.2           | 15.4            | 0.2            | 15.9                              | 25.2                | 13.5           | 31.2 | 13.5    | 15.6 | 4.5 | 11.9  |
| Gly | 35.2           | 12.1           | 39.1            | 13.5           | 8.5                               | 3.7                 | 9.8            | 11.3 | 5.4     | 5.0  | 1.9 | 65.7  |
| Gly | 37.8           | 12.3           | 38.4            | 11.5           | 9.5                               | 4.7                 | 8.9            | 11.5 | 5.3     | 5.5  | 1.6 | 64.6  |
| Gly | 39.8           | 11.1           | 36.8            | 12.4           | 9.3                               | 4.6                 | 8.7            | 10.4 | 5.1     | 4.5  | 1.9 | 66.0  |
| Hid | 75.9           | 19.8           | 4.1             | 0.2            | 25.1                              | 44.2                | 3.5            | 15.4 | 8.1     | 6.1  | 2.6 | 10.4  |
| Hie | 53.7           | 42.1           | 4.2             | < 0.1          | 16.9                              | 29.1                | 3.5            | 37.4 | 17.4    | 17.6 | 4.3 | 11.1  |
| Hip | 63.3           | 14.7           | 21.5            | 0.5            | 10.0                              | 47.7                | 16.6           | 8.6  | 4.7     | 2.1  | 4.4 | 14.5  |
| Ile | 29.6           | 67.6           | 2.9             | < 0.1          | 6.8                               | 15.6                | 2.6            | 64.2 | 23.5    | 39.8 | 1.7 | 10.0  |
| Leu | 55.1           | 36.8           | 7.8             | 0.3            | 22.9                              | 25.7                | 6.9            | 33.3 | 13.5    | 18.2 | 3.1 | 9.8   |
| Lys | 53.5           | 39.7           | 6.7             | < 0.1          | 19.2                              | 27.2                | 6.0            | 35.3 | 14.5    | 18.7 | 4.3 | 10.1  |
| Met | 60.6           | 34.8           | 4.5             | 0.1            | 21.9                              | 31.5                | 4.0            | 30.4 | 12.6    | 16.1 | 3.5 | 10.4  |
| Phe | 60.1           | 35.9           | 3.9             | < 0.1          | 20.2                              | 34.5                | 3.4            | 30.1 | 16.3    | 10.4 | 6.2 | 9.0   |
| Pro | 7.1            | 92.9           | -               | -              | 5.0                               | -                   | -              | 86.9 | 10.3    | 76.6 | -   | 8.1   |
| Ser | 49.0           | 45.0           | 5.7             | 0.3            | 23.5                              | 15.4                | 4.9            | 41.8 | 10.3    | 31.2 | 0.9 | 13.7  |
| Thr | 71.3           | 28.6           | 0.1             | < 0.1          | 42.1                              | 24.2                | 0.1            | 24.9 | 7.1     | 17.6 | 0.6 | 8.4   |
| Trp | 64.2           | 20.5           | 15.0            | 0.3            | 19.4                              | 38.9                | 13.1           | 16.7 | 9.3     | 5.9  | 2.9 | 10.5  |
| Trp | 63.2           | 30.0           | 6.6             | 0.2            | 22.0                              | 35.0                | 5.6            | 25.3 | 14.3    | 8.6  | 4.5 | 10.0  |
| Trp | 60.9           | 29.8           | 9.1             | 0.2            | 22.0                              | 33.3                | 7.9            | 25.3 | 13.3    | 9.4  | 4.6 | 9.4   |
| Tyr | 76.3           | 22.8           | 0.9             | < 0.1          | 25.8                              | 44.2                | 0.8            | 18   | 10.4    | 5.7  | 3.9 | 9.2   |
| Val | 51.5           | 46.6           | 1.8             | < 0.1          | 16.1                              | 29.3                | 1.7            | 42.4 | 16.8    | 24.7 | 1.8 | 9.6   |

**Table S8. Difference in the sampling of conformational regions of GGXGG relative to AAXAA in urea at 298 K**

| Population Frequency (%) |                |                |                 |                |                                   |                     |                |       |         |                  |                 |       |
|--------------------------|----------------|----------------|-----------------|----------------|-----------------------------------|---------------------|----------------|-------|---------|------------------|-----------------|-------|
| X                        | By quadrant    |                |                 |                | By specific conformational region |                     |                |       |         |                  |                 |       |
|                          | Q <sub>α</sub> | Q <sub>β</sub> | Q <sub>αL</sub> | Q <sub>o</sub> | α <sub>R</sub>                    | Near α <sub>R</sub> | α <sub>L</sub> | β     | Non-P β | P <sub>IIL</sub> | P <sub>IR</sub> | Other |
| Ala                      | 18.7           | -17.4          | -1.5            | 0.2            | 7.2                               | 11.2                | -1.5           | -20.3 | -9.2    | -9.2             | -2.7            | 4.2   |
| Arg                      | 11.8           | -10.0          | -1.8            | 0.1            | 4.4                               | 6.7                 | -1.8           | -11.1 | -4.6    | -5.9             | -1.0            | 2.2   |
| Asn                      | 28.0           | -25.5          | -2.6            | <0.1           | 13.3                              | 13.4                | -2.2           | -22.3 | -12.2   | -7.0             | -4.6            | -0.7  |
| Asp                      | -0.2           | 0.7            | -0.5            | 0.1            | 1.1                               | -2.1                | -0.6           | -0.2  | <<0.1   | 0.1              | -0.4            | 1.8   |
| Ash                      | 15.9           | -16.2          | 0.3             | 0.1            | 3.8                               | 11.3                | 0.3            | -13.7 | -7.7    | -1.9             | -5.9            | 0.3   |
| Cyh                      | 21.9           | -21.2          | -0.7            | 0.1            | 7.8                               | 15.4                | -0.5           | -22.7 | -10.1   | -10.7            | -3.5            | 1.6   |
| Gln                      | 16.0           | -10.0          | -5.9            | -0.1           | 5.9                               | 9.4                 | -5.3           | -11.7 | -4.3    | -6.7             | -1.1            | 2.1   |
| Glu                      | 10.7           | -12.0          | 1.3             | <<-0.1         | 5.9                               | 5.2                 | 1.1            | -13.4 | -5.2    | -7.3             | -1.3            | 1.6   |
| Glh                      | 24.9           | -12.0          | -12.7           | -0.1           | 7.9                               | 16.2                | -11.2          | -14.7 | -5.5    | -8.2             | -1.3            | 2.2   |
| Gly                      | 4.6            | -1.7           | 0.7             | -3.7           | 4.2                               | 4.3                 | -1.4           | -3.7  | -1.7    | -1.6             | -0.4            | -3.5  |
| Hid                      | -2.1           | 1.9            | 0.2             | <-0.1          | -0.7                              | -1.9                | 0.3            | 0.2   | -0.6    | 1.0              | -0.2            | 2.2   |
| Hie                      | 16.3           | -18.4          | 1.9             | 0.2            | 8.1                               | 8.8                 | 1.7            | -19.2 | -10.3   | -7.3             | -2.6            | 1.4   |
| Hip                      | 11.8           | 8.4            | -19.7           | -0.4           | 3.0                               | 7.0                 | -15.1          | 0.9   | 1.1     | -0.6             | 2.2             | 2.4   |
| Ile                      | 28.8           | -26.1          | -2.7            | <<-0.1         | 6.5                               | 20.7                | -2.4           | -34.3 | -12.9   | -21.0            | -0.4            | 9.5   |
| Leu                      | 22.1           | -17.9          | -4.0            | -0.2           | 9.1                               | 11.8                | -3.5           | -16.9 | -7.0    | -8.8             | -1.9            | 0.4   |
| Lys                      | 19.9           | -16.8          | -3.2            | 0.1            | 7.9                               | 11.3                | -2.9           | -17.6 | -6.2    | -10.2            | -1.9            | 2.2   |
| Met                      | 6.6            | -12.4          | 5.6             | 0.2            | 2.1                               | 4.8                 | 5.2            | -13.3 | -5.3    | -7.2             | -1.4            | 1.7   |
| Phe                      | 16.2           | -14.5          | -1.7            | <0.1           | 7.0                               | 8.3                 | -1.4           | -13.4 | -7.8    | -3.1             | -4.0            | 1.0   |
| Pro                      | 0.2            | -0.2           | -               | -              | 0.3                               | <<0.1               | -              | -0.9  | 5.8     | -6.7             | -               | 0.6   |
| Ser                      | 6.7            | -3.5           | -3.0            | -0.2           | 2.6                               | 4.7                 | -2.5           | -6.1  | 0.8     | -7.0             | 0.6             | 0.8   |
| Thr                      | -9.3           | 9.4            | <0.1            | <<0.1          | -8.3                              | -0.8                | <-0.1          | 6.4   | 3.7     | 2.7              | <0.1            | 2.7   |
| Trp                      | 12.5           | 0.9            | -13.1           | -0.2           | 8.2                               | 3.6                 | -11.5          | -0.3  | -0.9    | 1.1              | -0.8            | 0.3   |
| Tyr                      | 0.5            | -4.4           | 3.8             | 0.1            | 2.6                               | -1.6                | 3.2            | -4.2  | -3.5    | 0.3              | -2.0            | 1.0   |
| Val                      | 13.7           | -11.9          | -1.8            | <<-0.1         | 4.4                               | 8.6                 | -1.7           | -17.0 | -7.2    | -9.4             | -0.1            | 5.3   |

**Table S9. Conformational propensities of the guest residues (X) in GGXGG in water at 498 K.**

| Population Frequency (%) |                |                |                 |                |                                   |                        |                |      |             |      |        |       |
|--------------------------|----------------|----------------|-----------------|----------------|-----------------------------------|------------------------|----------------|------|-------------|------|--------|-------|
| X                        | By quadrant    |                |                 |                | By specific conformational region |                        |                |      |             |      |        |       |
|                          | Q <sub>α</sub> | Q <sub>β</sub> | Q <sub>αL</sub> | Q <sub>o</sub> | α <sub>R</sub>                    | Near<br>α <sub>R</sub> | α <sub>L</sub> | β    | Non-<br>P β | PIIL | PIR    | Other |
| <b>Ala</b>               | 44.0           | 46.5           | 8.0             | 1.5            | 14.7                              | 17.2                   | 4.5            | 29.5 | 17.7        | 9.0  | 7.5    | 29.4  |
| <b>Ala</b>               | 42.1           | 47.6           | 8.6             | 1.7            | 14.2                              | 16.2                   | 5.0            | 30.4 | 18.2        | 9.4  | 7.6    | 29.4  |
| <b>Ala</b>               | 44.1           | 45.2           | 9.1             | 1.6            | 15.2                              | 17.1                   | 5.4            | 28.3 | 16.5        | 9.1  | 7.2    | 29.4  |
| <b>Arg</b>               | 49.3           | 44.7           | 5.5             | 0.5            | 20.0                              | 19.0                   | 4.0            | 30.2 | 17.2        | 10.9 | 5.2    | 23.8  |
| <b>Asn</b>               | 51.4           | 42.3           | 5.5             | 0.8            | 22.2                              | 20.6                   | 3.7            | 31.1 | 18.6        | 9.9  | 5.3    | 19.8  |
| <b>Asp</b>               | 49.7           | 38.2           | 11.2            | 0.9            | 19.2                              | 25.0                   | 8.4            | 17.1 | 10.8        | 3.2  | 8.3    | 25.0  |
| <b>Ash</b>               | 51.4           | 41.0           | 6.8             | 0.8            | 21.6                              | 23.2                   | 4.3            | 28.2 | 18.5        | 6.3  | 7.1    | 19.0  |
| <b>Cyh</b>               | 45.1           | 48.2           | 5.9             | 0.8            | 17.6                              | 17.2                   | 4.2            | 32.4 | 18.1        | 12.3 | 5.4    | 25.2  |
| <b>Gln</b>               | 48.8           | 44.7           | 5.7             | 0.8            | 20.0                              | 18.6                   | 4.1            | 30.5 | 17.5        | 10.8 | 5.3    | 23.7  |
| <b>Glu</b>               | 45.7           | 48.3           | 5.6             | 0.4            | 19.9                              | 15.9                   | 4.1            | 33.8 | 18.2        | 13.6 | 5.1    | 23.3  |
| <b>Glh</b>               | 47.4           | 44.4           | 7.2             | 0.9            | 18.0                              | 19.8                   | 5.4            | 29.3 | 17.5        | 9.3  | 6.2    | 23.9  |
| <b>Gly</b>               | 31.5           | 17.9           | 33.0            | 17.6           | 8.6                               | 5.2                    | 5.4            | 11.6 | 7.1         | 3.5  | 3.0    | 67.3  |
| <b>Hid</b>               | 50.1           | 43.2           | 6.0             | 0.7            | 19.4                              | 20.8                   | 4.2            | 29.5 | 17.5        | 9.6  | 5.7    | 22.9  |
| <b>Hie</b>               | 49.9           | 44.8           | 4.5             | 0.7            | 21.8                              | 17.1                   | 3.0            | 33.7 | 18.1        | 14.1 | 3.4    | 22.6  |
| <b>Hip</b>               | 46.4           | 45.2           | 7.8             | 0.7            | 12.5                              | 24.6                   | 5.4            | 25.6 | 17.3        | 4.7  | 9.5    | 26.0  |
| <b>Ile</b>               | 41.3           | 57.9           | 0.8             | < 0.1          | 17.0                              | 15.5                   | 0.6            | 43.0 | 20.8        | 21.0 | 3.0    | 22.0  |
| <b>Leu</b>               | 54.9           | 40.7           | 4.0             | 0.4            | 25.3                              | 19.5                   | 2.9            | 30.3 | 16.7        | 11.7 | 3.9    | 19.9  |
| <b>Lys</b>               | 52.3           | 43.0           | 4.2             | 0.5            | 21.4                              | 20.1                   | 3.0            | 29.5 | 17.1        | 10.3 | 5.1    | 23.0  |
| <b>Met</b>               | 52.0           | 41.3           | 6.0             | 0.7            | 22.3                              | 19.2                   | 4.5            | 28.6 | 16.0        | 10.7 | 4.4    | 23.0  |
| <b>Phe</b>               | 49.4           | 44.8           | 5.2             | 0.6            | 20.3                              | 20.3                   | 3.7            | 32.9 | 18.7        | 12.1 | 4.6    | 20.4  |
| <b>Pro</b>               | 21.9           | 78.1           | -               | -              | 17.7                              | < 0.1                  | -              | 68.0 | 19.8        | 48.3 | << 0.1 | 14.3  |
| <b>Ser</b>               | 47.1           | 47.2           | 4.7             | 0.9            | 21.3                              | 13.7                   | 3.5            | 33.2 | 16.4        | 15.3 | 3.8    | 26.0  |
| <b>Thr</b>               | 48.8           | 49.9           | 1.2             | 0.1            | 25.4                              | 14.1                   | 1.0            | 36.6 | 17.4        | 18.1 | 2.7    | 21.3  |
| <b>Trp</b>               | 47.6           | 46.5           | 5.2             | 0.6            | 19.6                              | 18.7                   | 3.7            | 34.0 | 19.1        | 12.8 | 4.7    | 21.4  |
| <b>Tyr</b>               | 49.6           | 44.7           | 5.2             | 0.6            | 20.5                              | 20.5                   | 3.6            | 32.5 | 18.7        | 11.6 | 4.8    | 20.3  |
| <b>Val</b>               | 42.7           | 55.3           | 1.8             | 0.2            | 17.7                              | 17.1                   | 1.5            | 40.5 | 20.6        | 18.4 | 3.6    | 21.1  |

**Table S10. Conformational propensities of the guest residues (X) in AAXAA in water at 498 K**

**Population Frequency (%)**

| X   | By quadrant    |                |                 |                | By specific conformational region |                     |                |      |         |                  |                  |       |
|-----|----------------|----------------|-----------------|----------------|-----------------------------------|---------------------|----------------|------|---------|------------------|------------------|-------|
|     | Q <sub>α</sub> | Q <sub>β</sub> | Q <sub>αL</sub> | Q <sub>o</sub> | α <sub>R</sub>                    | Near α <sub>R</sub> | α <sub>L</sub> | β    | Non-P β | P <sub>III</sub> | P <sub>III</sub> | Other |
| Ala | 41.0           | 48.7           | 8.5             | 1.9            | 15.7                              | 14.0                | 5.1            | 33.6 | 19.8    | 10.6             | 6.9              | 27.9  |
| Ala | 41.9           | 48.4           | 8.2             | 1.4            | 15.8                              | 14.1                | 5.1            | 33.5 | 20.3    | 10.1             | 7.0              | 27.5  |
| Ala | 40.1           | 49.3           | 8.9             | 1.7            | 15.0                              | 13.6                | 5.4            | 34.8 | 20.6    | 10.3             | 7.1              | 28.0  |
| Arg | 44.2           | 48.9           | 6.0             | 0.9            | 19.4                              | 15.7                | 4.6            | 34.4 | 19.9    | 12.1             | 5.5              | 22.7  |
| Asn | 45.0           | 47.0           | 7.3             | 0.7            | 21.5                              | 15.9                | 5.0            | 36.6 | 22.5    | 11.1             | 5.5              | 18.4  |
| Asp | 48.5           | 37.1           | 13.3            | 1.1            | 20.4                              | 23.0                | 10.3           | 15.1 | 9.8     | 2.4              | 8.2              | 25.9  |
| Ash | 49.0           | 40.9           | 9.0             | 1.1            | 23.0                              | 19.5                | 6.5            | 29.2 | 19.3    | 6.1              | 7.2              | 18.5  |
| Cyh | 43.2           | 51.2           | 5.1             | 0.6            | 18.4                              | 14.4                | 3.5            | 36.1 | 20.6    | 13.3             | 5.1              | 24.6  |
| Gln | 44.6           | 46.1           | 8.5             | 0.8            | 20.1                              | 15.4                | 6.4            | 32.3 | 18.7    | 11.3             | 5.1              | 22.9  |
| Glu | 40.8           | 50.7           | 8.0             | 0.5            | 19.3                              | 12.4                | 6.4            | 35.8 | 20.1    | 13.4             | 5.4              | 23.1  |
| Glh | 43.2           | 48.9           | 7.2             | 0.7            | 17.7                              | 16.2                | 5.4            | 33.4 | 20.0    | 10.7             | 6.4              | 23.6  |
| Gly | 31.5           | 17.1           | 32.0            | 19.4           | 9.2                               | 4.2                 | 6.0            | 11.5 | 7.2     | 3.3              | 2.7              | 67.4  |
| Hid | 42.4           | 47.2           | 9.4             | 1.0            | 17.4                              | 16.4                | 6.9            | 33   | 20.0    | 10.2             | 6.0              | 23.2  |
| Hie | 44.3           | 48.9           | 6.1             | 0.7            | 22.4                              | 13.5                | 3.0            | 36.1 | 19.2    | 15.4             | 3.3              | 23.3  |
| Hip | 47.2           | 46.6           | 5.6             | 0.5            | 14.5                              | 23.0                | 3.7            | 28.4 | 19.4    | 4.9              | 9.6              | 24.8  |
| Ile | 39.2           | 59.7           | 1.0             | 0.1            | 17.3                              | 13.2                | 0.8            | 45   | 21.9    | 21.9             | 2.9              | 22.0  |
| Leu | 52.2           | 39.9           | 6.8             | 1.1            | 26.0                              | 16.7                | 5.1            | 29.9 | 16.7    | 11.3             | 3.8              | 20.3  |
| Lys | 47.1           | 45.5           | 6.6             | 0.9            | 21.4                              | 16.0                | 5.0            | 32.2 | 18.6    | 11.3             | 4.9              | 22.7  |
| Met | 47.6           | 44.4           | 6.7             | 1.3            | 22.0                              | 16.0                | 5.1            | 31.3 | 17.9    | 11.4             | 4.7              | 22.9  |
| Phe | 45.0           | 49.0           | 5.5             | 0.5            | 19.9                              | 16.5                | 4.1            | 36.5 | 21.3    | 12.8             | 5.0              | 20.5  |
| Pro | 23.5           | 76.5           | < 0.1           | -              | 19.1                              | << 0.1              | -              | 67.1 | 18.7    | 48.5             | << 0.1           | 13.7  |
| Ser | 43.9           | 51.2           | 4.2             | 0.8            | 21.8                              | 10.0                | 3.2            | 37   | 17.9    | 17.5             | 3.8              | 25.7  |
| Thr | 48.6           | 50.2           | 1.1             | 0.1            | 28.1                              | 11.1                | 0.9            | 37.3 | 17.6    | 18.8             | 2.4              | 21.2  |
| Trp | 44.4           | 47.9           | 6.9             | 0.8            | 20.2                              | 15.2                | 5.3            | 35.3 | 20.0    | 13.4             | 4.1              | 21.9  |
| Tyr | 48.7           | 43.2           | 7.1             | 1.0            | 22.3                              | 17.8                | 5.4            | 30.9 | 18.0    | 10.7             | 4.5              | 21.2  |
| Val | 33.9           | 63.1           | 3.0             | < 0.1          | 15.4                              | 11.2                | 2.5            | 49.9 | 24.8    | 23.5             | 3.5              | 19.1  |

**Table S11. Difference in the sampling of conformational regions of GGXGG relative to AAXAA in water at 498 K**

**Population Frequency (%)**

| X          | By quadrant    |                |                 |                | By specific conformational region |                     |                |      |         |                  |                 |         |
|------------|----------------|----------------|-----------------|----------------|-----------------------------------|---------------------|----------------|------|---------|------------------|-----------------|---------|
|            | Q <sub>α</sub> | Q <sub>β</sub> | Q <sub>αL</sub> | Q <sub>o</sub> | α <sub>R</sub>                    | Near α <sub>R</sub> | α <sub>L</sub> | β    | Non-P β | P <sub>III</sub> | P <sub>IR</sub> | Other   |
| <b>Ala</b> | 3.0            | -2.2           | -0.5            | -0.4           | -1                                | 3.2                 | -0.6           | -4.1 | -2.1    | -1.6             | 0.6             | 1.5     |
| <b>Arg</b> | 5.1            | -4.1           | -0.5            | -0.5           | 0.6                               | 3.3                 | -0.6           | -4.2 | -2.8    | -1.2             | -0.3            | 1.1     |
| <b>Asn</b> | 6.5            | -4.7           | -1.7            | < 0.1          | 0.6                               | 4.7                 | -1.3           | -5.5 | -4.0    | -1.3             | -0.2            | 1.4     |
| <b>Asp</b> | 1.2            | 1.1            | -2.1            | -0.2           | -1.1                              | 2.0                 | -1.9           | 2.0  | 1.1     | 0.8              | 0.1             | -0.9    |
| <b>Ash</b> | 2.4            | 0.1            | -2.2            | -0.2           | -1.4                              | 3.7                 | -2.1           | -1.0 | -0.7    | 0.1              | < -0.1          | 0.5     |
| <b>Cyh</b> | 1.9            | -3.0           | 0.8             | 0.2            | -0.8                              | 2.8                 | 0.6            | -3.7 | -2.6    | -1.0             | 0.4             | 0.6     |
| <b>Gln</b> | 4.2            | -1.5           | -2.8            | < 0.1          | -0.1                              | 3.1                 | -2.3           | -1.8 | -1.2    | -0.5             | 0.1             | 0.8     |
| <b>Glu</b> | 5.0            | -2.4           | -2.4            | -0.1           | 0.6                               | 3.5                 | -2.3           | -2.0 | -2.0    | 0.2              | -0.2            | 0.2     |
| <b>Glh</b> | 4.2            | -4.4           | 0.1             | 0.2            | 0.3                               | 3.5                 | -0.1           | -4.1 | -2.5    | -1.4             | -0.2            | 0.3     |
| <b>Gly</b> | < -0.1         | 0.8            | 1.0             | -1.7           | -0.6                              | 0.9                 | -0.6           | 0.1  | -0.1    | 0.2              | 0.3             | -0.1    |
| <b>Hid</b> | 7.7            | -4.0           | -3.4            | -0.3           | 2.0                               | 4.5                 | -2.7           | -3.4 | -2.5    | -0.6             | -0.3            | -0.3    |
| <b>Hie</b> | 2.6            | -2.9           | 0.4             | -0.1           | -0.6                              | 3.6                 | < 0.1          | -2.4 | -1.1    | -1.3             | 0.1             | -0.7    |
| <b>Hip</b> | -0.9           | -1.5           | 2.2             | 0.1            | -2.0                              | 1.6                 | 1.7            | -2.8 | -2.2    | -0.2             | -0.1            | 1.2     |
| <b>Ile</b> | 2.1            | -1.8           | -0.2            | -0.1           | -0.4                              | 2.4                 | -0.2           | -2.0 | -1.1    | -0.8             | 0.1             | << -0.1 |
| <b>Leu</b> | 2.6            | 0.8            | -2.8            | -0.7           | -0.7                              | 2.7                 | -2.2           | 0.4  | < 0.1   | 0.4              | 0.1             | -0.4    |
| <b>Lys</b> | 5.2            | -2.5           | -2.4            | -0.4           | < 0.1                             | 4.1                 | -1.9           | -2.6 | -1.5    | -1.1             | 0.2             | 0.3     |
| <b>Met</b> | 4.4            | -3.1           | -0.7            | -0.6           | 0.3                               | 3.2                 | -0.7           | -2.7 | -1.9    | -0.7             | -0.3            | < 0.1   |
| <b>Phe</b> | 4.5            | -4.2           | -0.3            | 0.1            | 0.4                               | 3.8                 | -0.4           | -3.6 | -2.5    | -0.7             | -0.4            | -0.1    |
| <b>Pro</b> | -1.6           | 1.6            | << -0.1         | -              | -1.4                              | << 0.1              | -              | 0.9  | 1.1     | -0.2             | < -0.1          | 0.6     |
| <b>Ser</b> | 3.3            | -3.9           | 0.5             | 0.1            | -0.5                              | 3.7                 | 0.3            | -3.9 | -1.6    | -2.2             | < -0.1          | 0.3     |
| <b>Thr</b> | 0.2            | -0.3           | 0.1             | 0.0            | -2.7                              | 3.0                 | 0.1            | -0.7 | -0.2    | -0.6             | 0.3             | 0.1     |
| <b>Trp</b> | 3.3            | -1.4           | -1.7            | -0.2           | -0.6                              | 3.5                 | -1.5           | -1.3 | -0.9    | -0.6             | 0.6             | -0.5    |
| <b>Tyr</b> | 0.9            | 1.5            | -1.9            | -0.5           | -1.8                              | 2.7                 | -1.8           | 1.7  | 0.7     | 0.9              | 0.2             | -0.9    |
| <b>Val</b> | 8.8            | -7.8           | -1.2            | 0.2            | 2.3                               | 5.8                 | -1.0           | -9.5 | -4.2    | -5.1             | 0.1             | 2.0     |
